# Supplementary figures and images for: Macro bead formation based on polyelectrolyte complexation between long-chain polyphosphates and chitosan
Source: Royal Society of Chemistry journal article supplement (doi:10.1039/d2ma01091g), 2023-01-01

Supporting information

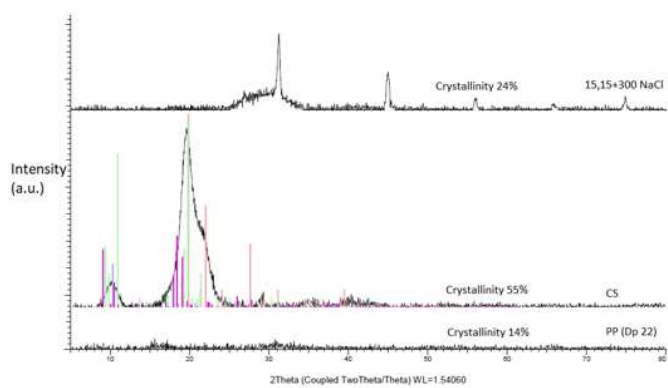

*Figur S1. X-ray diffraction spectrum of PP, CS powder, and (15,15+300 ) beads*

Supplement: d2ma01091g1.pdf [file d2ma01091g1.pdf]
